# Supplementary material
Source: PubMed Central journal article supplement (PMC3868633)
Supplement: NIHMS507195-supplement-01.pdf [file NIHMS507195-supplement-01.pdf]

Table S1. Description of samples assayed for *AKT1* p.Glu17Lys mutation.

| Sample number | Patient | Type <sup>1</sup> | Anatomical location                           |
|---------------|---------|-------------------|-----------------------------------------------|
| 34EN1         | 34      | EN                | abdomen                                       |
| 78EN1         | 78      | EN                | left hand                                     |
| 78EN2         | 78      | EN                | left hand                                     |
| 89EN1         | 89      | EN                | right neck                                    |
| 95EN1         | 95      | EN                | left groin                                    |
| 101EN1        | 101     | EN                | left side infraaxillary vault                 |
| 106EN1        | 106     | EN                | right axilla- plaque                          |
| 106EN2        | 106     | EN                | right axilla - tag                            |
| 134EN1        | 134     | EN                | right hand                                    |
| 52CTN1        | 52      | CCTN              | left foot                                     |
| 75CTN1        | 75      | CCTN              | plantar surface, left great toe               |
| 75CTN2        | 75      | CCTN              | plantar surface, left great toe               |
| 75CTN3        | 75      | CCTN              | left great toe                                |
| 75CTN4        | 75      | CCTN              | left great toe                                |
| 75CTN5        | 75      | CCTN              | ball, left foot                               |
| 103CTN1       | 103     | CCTN              | ball, left foot                               |
| 75UN1         | 75      | unknown           | dorsal surface distal to nail, left great toe |
| 75UN2         | 75      | unknown           | dorsal surface, left great toe                |
| 75UN3         | 75      | unknown           | border of normal skin, left great toe         |
| 78UN1         | 78      | unaffected        | left forearm                                  |

<sup>1</sup>EN, epidermal nevus; CCTN, cerebriform connective tissue nevus; unknown, normal appearing tissue bordering a CCTN; unaffected, normal appearing tissue far removed from a lesion
